# Supplementary material for: Metabolomics Biomarkers for Detection of Colorectal Neoplasms: A Systematic Review
Source: PubMed Central journal article supplement (PMC6116151; doi:10.3390/cancers10080246), 2018-07-27
Supplement: cancers-10-00246-s001.pdf [file cancers-10-00246-s001.pdf]

# Supplementary Materials: Metabolomics Biomarkers for Detection of Colorectal Neoplasms: A Systematic Review

Vanessa Erben, Megha Bhardwaj, Petra Schrotz-King and Hermann Brenner

Figure S1. QUADAS Overview.

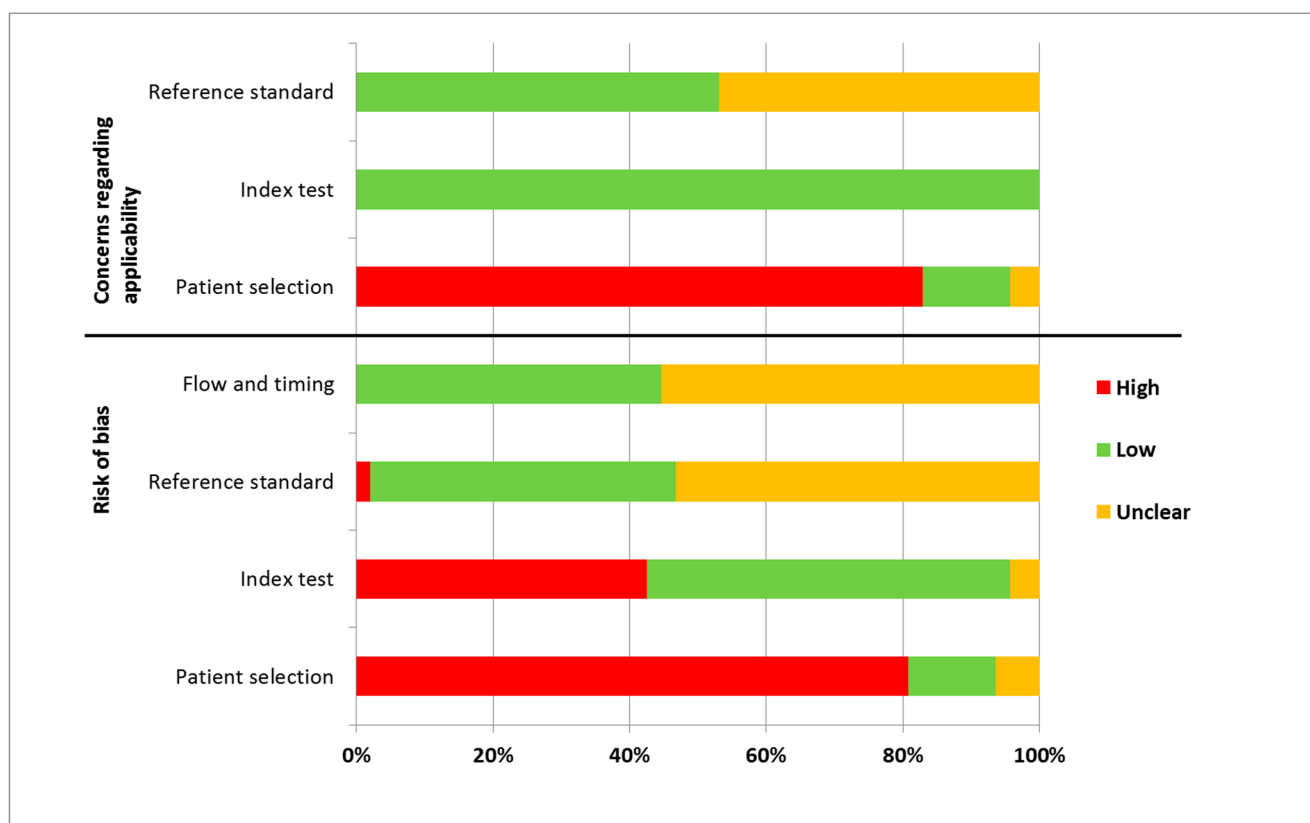

Note: red bar, proportion with high risk; green bar, proportion with low risk; yellow bar, proportion with unclear risk.

**Table S1.** Performance characteristics of single metabolites and metabolomic panels of potential biomarkers with additional outcomes.

| First author, Year         | Outcomes                                | Metabolites  |                 |    |        | Diagnostic performance |       |                        |                     |      | p-value |          |
|----------------------------|-----------------------------------------|--------------|-----------------|----|--------|------------------------|-------|------------------------|---------------------|------|---------|----------|
|                            |                                         | Am A/<br>Pep | FA              | CH | Others | Sn                     | Sp    | AUC - No<br>validation | AUC with validation |      |         |          |
|                            |                                         |              |                 |    |        |                        |       | SS                     | CV                  | BS   | EV      |          |
| <b>Serum</b>               |                                         |              |                 |    |        |                        |       |                        |                     |      |         |          |
| Guo, 2017 [24]             | Stage I/II ♂                            | 0            | 5               | 0  | 0      | 73.1                   | 87.1  | 0.85                   |                     |      |         | n.a.     |
|                            | Stage I/II ♀                            | 0            | 2               | 0  | 0      | 81.3                   | 86.5  | 0.90                   |                     |      |         | n.a.     |
| Uchiyama, 2017 [23]        | A                                       | 0            | 1 <sup>C7</sup> | 0  | 0      | 88.0                   | 85.0  | 0.92                   |                     |      |         | <0.01    |
| Farshidfar, 2016 [14]      | A                                       | 2            | 2               | 1  | 9      | n.a.                   | n.a.  |                        | 0.81                | 0.81 |         | <0.0001  |
| Zhang, 2016 [26]           | Early CRC vs.<br>Cn + BCD               | 0            | 4               | 0  | 0      | 84.6                   | 89.8  |                        | 0.93                |      |         | <0.001   |
| F. Li, 2013 [29]           | Stage I/II                              | 0            | 10              | 0  | 0      | 98.1                   | 100.0 | 0.99                   |                     |      |         | <0.05    |
| Nishiumi, 2012 [35]        | Stage 0, I, I                           | 3            | 0               | 1  | 0      | 82.8                   | n.a.  |                        | n.a.                |      |         | <0.05    |
| <b>Plasma</b>              |                                         |              |                 |    |        |                        |       |                        |                     |      |         |          |
| Nishiumi et al., 2017 [39] | Stage 0                                 | 3            | 3               | 2  | 0      | 100.0                  | 100.0 | n.a.                   |                     |      |         | 0.000781 |
|                            | Stage I                                 | 3            | 3               | 2  | 0      | 97.5                   | 91.3  |                        |                     |      |         |          |
|                            | Stage II                                | 3            | 3               | 2  | 0      | 100.0                  | 91.7  |                        |                     |      |         |          |
| S. Li, 2013 [43]           | AP                                      | 0            | 4               | 0  | 0      | 89.0                   | 80.0  |                        |                     | n.a. |         | <0.05    |
| Miyagi, 2011 [44]          | Stage 0                                 | 10           | 0               | 0  | 0      | n.a.                   | n.a.  |                        | 0.90                |      |         | <0.001   |
|                            | Stage I                                 | 10           | 0               | 0  | 0      |                        |       |                        | 0.86                |      |         |          |
|                            | Stage II                                | 10           | 0               | 0  | 0      |                        |       |                        | 0.92                |      |         |          |
|                            | Stage III                               | 10           | 0               | 0  | 0      |                        |       |                        | 0.82                |      |         |          |
|                            | Stage IV                                | 10           | 0               | 0  | 0      |                        |       |                        | 0.95                |      |         |          |
| <b>Urine</b>               |                                         |              |                 |    |        |                        |       |                        |                     |      |         |          |
| Nakajima, 2018 [47]        | CRC vs. Cn +<br>BCD                     | 2            | 0               | 0  | 0      | n.a.                   | n.a.  |                        |                     | 0.96 |         |          |
| Johnson, 2006 [20]         | CRC/large P vs.<br>small + no<br>polyps | 0            | 1               | 0  | 0      | 88.0                   | 53.0  | 0.70                   |                     |      |         | <0.05    |
| Hiramatsu, 2005 [56]       | Stage 0                                 | 1            | 0               | 0  | 0      | 60.0                   | n.a.  | n.a.                   |                     |      |         | <0.0001  |
|                            | Stage I                                 | 1            | 0               | 0  | 0      | 62.5                   | n.a.  |                        |                     |      |         |          |
|                            | Stage II                                | 1            | 0               | 0  | 0      | 71.7                   | n.a.  |                        |                     |      |         |          |
|                            | Stage III                               | 1            | 0               | 0  | 0      | 83.2                   | n.a.  |                        |                     |      |         |          |
|                            | Stage IV                                | 1            | 0               | 0  | 0      | 90.5                   | n.a.  |                        |                     |      |         |          |

**Abbreviations:** (A)A, (advanced) adenomas; ACN, advanced colorectal neoplasms; Am A, amino acids, AP, adenomatous polyps; AUC, area under the curve; BCD, benign colorectal disease; BS, bootstrapping; C7, benzoic acid; CH, carbohydrates; CRC, colorectal cancer; CV, cross validation; EV, external validation; FA, fatty acids; P, polyps; pep, peptides; Sn, sensitivity; Sp, specificity; SS, subsampling.

**Table S2.** Additional potential biomarkers and biomarker panels for detection of adenomas, advanced colorectal neoplasms, polyps or early stage CRC.

| Author, Year          |                                                                                                                                                                       | Others                     |
|-----------------------|-----------------------------------------------------------------------------------------------------------------------------------------------------------------------|----------------------------|
| Serum                 |                                                                                                                                                                       |                            |
| Guo, 2017 [24]        | ♂ Fatty acids: SM (34:1), PC (34:2), PC (34:1), PC (36:3), PC (36:2)<br>♀ Fatty acids: PC (36:4), PC (36:3)                                                           |                            |
| Uchiyama, 2017 [23]   | Fatty acids: ↓ Benzoic acid                                                                                                                                           |                            |
| Farshidfar, 2016 [14] | Amino acids/ peptides: → Cystine, Glu<br>Fatty acids: → heptadecanoic acid, glyceric acid<br>Carbohydrates: → erythriol                                               | unknown (6),<br>alkane (3) |
| Zhang, 2016 [26]      | Fatty acids: ↓ C16:1 (palmitoleic acid), C18:2 (linoleic acid), C20:4 (arachidonic acid), C22:6 (docosahexanoic acid)                                                 |                            |
| F. Li, 2013 [29]      | Fatty acids: ↓ Palmitic amide, oleamide, hexadecanedioic acid, octadecanoic acid, eicosatrienic acid, LPC(18:2), LPC(20:4), LPC(22:6), myristic acid, ↑ LPC(16:0)     |                            |
| Nishiumi, 2012 [35]   | Amino acids/ peptides: ↑ Asp, kynurenine, cystamine<br>Carbohydrates: ↑ 2-hydroxybutyrate                                                                             |                            |
| Plasma                |                                                                                                                                                                       |                            |
| Nishiumi, 2017 [39]   | Amino acids/ peptides: ↑ Orn, ↓ Trp, Lys<br>Fatty acids: ↑ glycolic acid, ↓ palmitoleic acid, 3-hydroxyisovaleric acid<br>Carbohydrates: ↑ Pyruvic acid, fumaric acid |                            |
| S. Li, 2013 [43]      | Fatty acids: → Saturated LPC, 20:4 LPC, 16:0 sphingomyelin, 18:0 sphingomyelin                                                                                        |                            |
| Miyagi, 2011 [44]     | Amino acids/ peptides: ↑ Ser, Ala, Ile, Leu, Lys, ↓ Val, Tyr, His, Trp, Arg                                                                                           |                            |
| Urine                 |                                                                                                                                                                       |                            |
| Nakajima, 2018 [47]   | Amino acids/ peptides: ↑ N1, N12-acetylspermine, N1, N8-acetylspermidine                                                                                              |                            |
| Johnson, 2006 [20]    | Fatty acids: ↑ PGE-M                                                                                                                                                  |                            |
| Hiramatsu, 2005 [6]   | Amino acids/ peptides: ↑ N1, N12-Diacetylspermine                                                                                                                     |                            |

**Abbreviations:** Ala, alanine; Arg, arginine; His, histidine; Ile, isoleucine; Leu, leucine; LPC, lysophosphatidylcholine; Lys, lysine; Orn, ornithine; PGE-M, Prostaglandin E2 metabolite; Ser, serine, Trp, tryptophan; Tyr, tyrosine; Val, valine.

**Table S3.** Biochemical affiliations of potential biomarkers and biomarker panels.

| First author, Year                                                                                                                                                                                                                                                                                                                                                                                                                                                                | Others                             |
|-----------------------------------------------------------------------------------------------------------------------------------------------------------------------------------------------------------------------------------------------------------------------------------------------------------------------------------------------------------------------------------------------------------------------------------------------------------------------------------|------------------------------------|
| Dried blood spot                                                                                                                                                                                                                                                                                                                                                                                                                                                                  |                                    |
| Jing, 2017 [18]                                                                                                                                                                                                                                                                                                                                                                                                                                                                   |                                    |
| Amino acids/ peptides: ↓ Arg, Phe/Tyr, Ala, Val<br>Fatty acids: ↑ C16, ↓ C4/C8, C5/C3, C4/C3                                                                                                                                                                                                                                                                                                                                                                                      |                                    |
| Serum                                                                                                                                                                                                                                                                                                                                                                                                                                                                             |                                    |
| Zhang, 2018 [22]                                                                                                                                                                                                                                                                                                                                                                                                                                                                  |                                    |
| Fatty acids: ↑ 5-hydroxyl-eicosatetraenoic acid, ↓ 12-hydroxyl-eicosatetraenoic acid                                                                                                                                                                                                                                                                                                                                                                                              |                                    |
| Guo, 2017 [24]                                                                                                                                                                                                                                                                                                                                                                                                                                                                    |                                    |
| Fatty acids ♂: SM (34:1), PC (34:2), PC (34:1), PC (36:3), PC (36:2); Fatty acids ♀: PC (36:4), PC (36:3)                                                                                                                                                                                                                                                                                                                                                                         |                                    |
| Hata, 2017 [25]                                                                                                                                                                                                                                                                                                                                                                                                                                                                   |                                    |
| Fatty acids: ↓ Gastrointestinal tract acid 446 (GTA-446)                                                                                                                                                                                                                                                                                                                                                                                                                          |                                    |
| Uchiyama, 2017 [23]                                                                                                                                                                                                                                                                                                                                                                                                                                                               |                                    |
| Amino acids/ peptides: ↓ His;<br>Fatty acids: ↑ Octanoic acid, decanoic acid, ↓ Benzoic acid                                                                                                                                                                                                                                                                                                                                                                                      |                                    |
| Farshidfar, 2016 [14]                                                                                                                                                                                                                                                                                                                                                                                                                                                             |                                    |
| Amino acids/ peptides: ↑ Phe, Ile, Lys, Gly, Tyr, Ala, allo Thr, ↓ Cystine, threonic acid<br>Fatty acids: ↑ Stearic acid, glyceric acid, palmitic acid, linoleic acid, 2-monostearoyl-glycerol, ↓ Glycerol palmitate, hexadecanoic acid derivative<br>Carbohydrates: ↑ Lactic acid, di-TMS ethylene glycol, citric acid, myo-inositol glycerol-3-phosphate, 3-hydroxy butanoic acid, 2-hydroxy butanoic acid, ↓ Fructose, D-ribose 5-phosphate, glycerol, arabinose, malonic acid |                                    |
|                                                                                                                                                                                                                                                                                                                                                                                                                                                                                   | ↓ nonane, unknown (11), alkane (1) |
| Y. Zhang, 2016 [26]                                                                                                                                                                                                                                                                                                                                                                                                                                                               |                                    |
| Fatty acids: ↓ C16:1 (palmitoleic acid), C18:3 (linolenic acid), C18:2 (linoleic acid), C18:1 (oleic acid), C20:4 (arachidonic acid), C22:6 (docosahexanoic acid)                                                                                                                                                                                                                                                                                                                 |                                    |
| H. Gu, 2015 [27]                                                                                                                                                                                                                                                                                                                                                                                                                                                                  |                                    |
| Amino acids/ peptides: ↑ Asp, Glu, ↓ Gln /Lys, His, Arg, Ser, Tyr                                                                                                                                                                                                                                                                                                                                                                                                                 |                                    |
| Zhu, 2014 [28]                                                                                                                                                                                                                                                                                                                                                                                                                                                                    |                                    |
| Amino acids/ peptides: ↑ Hyp/ aminolevulinate, hippuric acid, leucic acid, ↓ His, 2-aminoadipate, N-acetylglycine, Met<br>Fatty acids: ↑ Glycocholate, glycochenodeoxycholate, ↓ Linolenic acid<br>Carbohydrates: ↑ Glyceraldehyde, maleic acid, ↓ Malonic acid/ 3-hydroxybutyrate (3HBA)                                                                                                                                                                                         |                                    |
| F. Li, 2013 [29]                                                                                                                                                                                                                                                                                                                                                                                                                                                                  |                                    |
| Fatty acids: ↑ LPC(16:0), ↓ Palmitic amide, oleamide, hexadecanedioic acid, octadecanoic acid, eicosatrienoic acid, myristic acid, LPA(16:0), LPA(18:0)                                                                                                                                                                                                                                                                                                                           |                                    |
| Ritchie, 2013 [30]                                                                                                                                                                                                                                                                                                                                                                                                                                                                |                                    |
| Fatty acids: ↓ Gastrointestinal tract acid 446 (GTA-446)                                                                                                                                                                                                                                                                                                                                                                                                                          |                                    |
| Tan, 2013 [31]                                                                                                                                                                                                                                                                                                                                                                                                                                                                    |                                    |
| Amino acids/ peptides: ↓ 4-Hyp, Orn, Trp, Phe, Glu, urea<br>Fatty acids: ↑ Oleic acid<br>Carbohydrates: ↑ 2-hydroxybutanoic acid, 3-hydroxybutanoic acid, pyruvate                                                                                                                                                                                                                                                                                                                |                                    |
| Ikeda, 2012 [32]                                                                                                                                                                                                                                                                                                                                                                                                                                                                  |                                    |
| Amino acids/ peptides: ↑ L-Ala, L-Gln, → L-Pro, L-Met, L-Glu, Asn<br>Fatty acids: ↑ Glycolic acid, thiodiglycolic acid, 3-hydroxy-propionic acid<br>Carbohydrates: ↑ Glucuronic lactone, lactic acid, 3-hydroxy-isobutyric acid                                                                                                                                                                                                                                                   |                                    |
| Leichtle, 2012 [33]                                                                                                                                                                                                                                                                                                                                                                                                                                                               |                                    |
| Amino acids/ peptides: ↓ Gly, Lys, Ala, Asp, His, Leu/Ile, Met, sarcosine, Thr, Tyr, Val                                                                                                                                                                                                                                                                                                                                                                                          |                                    |
| Ma, 2012 [34]                                                                                                                                                                                                                                                                                                                                                                                                                                                                     |                                    |
| Amino acids/ peptides: ↓ L-Val, L-Thr, Gly<br>Carbohydrates: ↑ 3-hydroxybutyric acid, ↓ ribitol ↓, 1-deoxyglucose                                                                                                                                                                                                                                                                                                                                                                 |                                    |
| Nishiumi, 2012 [35]                                                                                                                                                                                                                                                                                                                                                                                                                                                               |                                    |
| Amino acids/ peptides: ↑ Asp, kynurenine, cystamine<br>Carbohydrates: ↑ 2-hydroxybutyrate                                                                                                                                                                                                                                                                                                                                                                                         |                                    |

|                        |                                                                                                                                                                                                                                                                    |
|------------------------|--------------------------------------------------------------------------------------------------------------------------------------------------------------------------------------------------------------------------------------------------------------------|
| Ritchie, 2010 [36]     | Fatty acids: ↓ C28H46O4 (446), C28H48O4 (448), C28H50O4 (450)                                                                                                                                                                                                      |
| Ludwig, 2009 [37]      | Fatty acids: → Acetate;<br>Carbohydrates: → Lactate, pyruvate, 3-hydroxybutyrate, acetoacetate                                                                                                                                                                     |
| Plasma                 |                                                                                                                                                                                                                                                                    |
| Liu, 2018 [38]         | Amino acids/ peptides: ↑ Homocysteine                                                                                                                                                                                                                              |
| Nishiumi, 2017 [39]    | Amino acids/ peptides: ↑ Orn, ↓ Trp, Lys<br>Fatty acids: ↑ Glycolic acid, ↓ Palmitoleic acid, 3-hydroxyisovaleric acid<br>Carbohydrates: ↑ Pyruvic acid, fumaric acid                                                                                              |
| Shen, 2017 [40]        | Fatty acids: ↑ PG (34:0), SM (42:2), Cer (44:5), ↓ LPC (18:3), LPC (18:2), PE (O-36:3), PE (O-38:3), SM (38:8)                                                                                                                                                     |
| Crotti, 2016 [41]      | Fatty acids: ↑ Decanoic acid                                                                                                                                                                                                                                       |
| Cavia-Saiz, 2014 [42]  | Amino acids/ peptides: ↑ L-Kynurenine                                                                                                                                                                                                                              |
| S. Li, 2013 [43]       | Fatty acids: ↓ Saturated LPC, 18:2 LPC, SPC                                                                                                                                                                                                                        |
| Miyagi, 2011 [44]      | Amino acids/ peptides: ↑ Ser, Ala, Ile, Leu, Lys, ↓ Val, Tyr, His, Trp, Arg                                                                                                                                                                                        |
| Okamoto, 2009 [45]     | Amino acids/ peptides: ↓ Thr, Val, ↑ Glu, alpha-aminobutyric acid, Gln, Pro                                                                                                                                                                                        |
| Zhao, 2007 [46]        | Fatty acids: 18:2-LPC, 18:1 LPC, unsat. LPC, sat. LPC                                                                                                                                                                                                              |
| Urine                  |                                                                                                                                                                                                                                                                    |
| Nakajima, 2018 [47]    | Amino acids/ peptides: ↑ N1,N12-Diacetylspermine                                                                                                                                                                                                                   |
| Deng, Chang, 2017 [48] | Fatty acids: ↓ Carnitine<br>Carbohydrates: ↓ Succinic acid, ascorbic acid                                                                                                                                                                                          |
| Deng, Fang, 2017 [19]  | Amino acids/ peptides: ↓ Ser, → β-Ala, p-Methylhistidine, Asn, trigonelline, His, Tyr<br>Fatty acids: → Butyrate, adipate<br>Carbohydrates: → Methanol, ethanol, 3-hydroxymandelate, benzoate, acetone, 3-Hydroxybutyrate, 3-Hydroxy-phenylacetate, 2-oxoglutarate |
| Wang, 2017 [49]        | Amino acids/ peptides: ↓ Asn, Ala, Gln<br>Carbohydrates: ↑ Acetoacetate                                                                                                                                                                                            |
| Rozalski, 2015 [50]    | Carbohydrates: ↑ 8-oxo-7,8-dihydroguanine, 8-oxo-7,8-dihydro-2'-deoxyguanosine, ↓ 5-hydroxymethyluracil                                                                                                                                                            |
| Wang, 2014 [51]        | Amino acids/ peptides: ↓ Ser, → β-Ala, p-Methylhistidine, Asn, trigonelline, His, Tyr<br>Fatty acids: → Butyrate, adipate<br>Carbohydrates: → Methanol, ethanol, 3-hydroxymandelate, benzoate, acetone, 3-Hydroxybutyrate, 3-Hydroxy-phenylacetate, 2-oxoglutarate |
| Eisner, 2013 [16]      | Amino acids/ peptides: ↑ Trigonelline, Tyr<br>Carbohydrates: ↓ Methanol, ↓ acetone                                                                                                                                                                                 |
| Hsu, 2013 [52]         | Carbohydrates: ↑ Adenosine, cytidine, 3-methylcytidine, 1-methyladenosine, inosine, 2-deoxyguanosine                                                                                                                                                               |
| Yue, 2013 [17]         | Fatty acids: ↓ C9H18N2O, C14H14N12O, C13H13NO4, C15H20NO5, O-octanoyl-R-carnitine, C19H35NO5, sphinganine, dihydrosphingosine, 16H22O4      Unknown (1)                                                                                                            |
| Chen, 2012 [53]        | Amino acids/ peptides: ↑ Arg, Ile, Leu, Val, ↓ His, Met, Ser, Asp<br>Carbohydrates: ↑ Lactic acid, ↓ Citric acid, malic acid, succinate                                                                                                                            |
| Cheng, 2012 [54]       | Amino acids/ peptides: ↑ Putrescine, 2-aminobutyrate, ↓ Kynurenate, hippurate<br>Fatty acids: ↑ Myristate                                                                                                                                                          |

|                      |                                                                                                                                                                                                                                              |                |
|----------------------|----------------------------------------------------------------------------------------------------------------------------------------------------------------------------------------------------------------------------------------------|----------------|
|                      | Carbohydrates: ↓ Citrate, p-cresol                                                                                                                                                                                                           |                |
| Wang, 2010 [21]      | Amino acids/ peptides: → Phenylacetylglutamine, leucylproline, aspartyllysine, prolylleucine<br>Fatty acids: → Acylcarnitine (C13:0), acylcarnitine, acylcarnitine (C9:0), acylcarnitine (C9-OH), C11H20O4N2                                 | Unknown<br>(3) |
| Wang, 2010 [21]      | Carbohydrates: ↑ Pseudouridine, cytidine, 2,2-dimethylguanosine, uridine, (1 unknown), 1-methyladenosine, N6-methyladenosine                                                                                                                 |                |
| Johnson, 2006 [20]   | Fatty acids: ↑ PGE-M                                                                                                                                                                                                                         |                |
| Feng, 2005 [55]      | Carbohydrates: ↑ Pseudouridine, 1-methylguanosine                                                                                                                                                                                            |                |
| Hiramatsu, 2005 [56] | Amino acids/ peptides: ↑ N1,N12-Diacetylspermine                                                                                                                                                                                             |                |
| Zheng, 2005 [57]     | Carbohydrates: ↑ Pseudouridine, cytidine, 1-methyladenosine, inosine, 5-methyluridine, 1-methylinosine, 1-methylguanosine, N4-acetylcytidine, N2-methylguanosine, adenosine, N2,N2-methylguanosine, N6-methyladenosine, ↓ uridine, guanosine |                |
| Feces                |                                                                                                                                                                                                                                              |                |
| Lin, 2016 [58]       | Amino acids/ peptides: ↓ Gln, ↑ Pro, Ile/Leu/Val, Ala, Glu, dimethylglycine<br>Fatty acids: ↓ Acetate, propionate, butyrate<br>Carbohydrates: ↑ Succinate, lactate, ↓ Glucose                                                                |                |
| Amiot, 2015 [59]     | Amino acids/ peptides: ↓ Gln, Glu<br>Fatty acids: ↑ Valerate, propionate, butyrate, acetate<br>Carbohydrates: ↓ β-glucose                                                                                                                    |                |
| Phua, 2014 [15]      | Fatty acids: ↓ Linoleic acid<br>Carbohydrates: ↓ Nicotinic acid, fructose                                                                                                                                                                    |                |
| Bezabeh, 2009 [60]   | Amino acids/ peptides: → Glu, Val, Ile<br>Fatty acids: → n-butyric acid, lipid                                                                                                                                                               |                |

**Abbreviations:** Ala, alanine; Arg, arginine; Asn, asparagine; Asp, aspartic acid (aspartate); Cer, ceramide; Cys, cysteine; Gln, glutamine; Glu, glutamic acid (glutamate); GTA-446, Gastrointestinal tract acid 446; His, histidine; Hyp, hydroxyproline; Ile, isoleucine; Leu, leucine; LPA, lysophosphatidic acid; LPC, lysophosphatidylcholine; Lys, lysine; Met, methionine; Orn, ornithine; PC, phosphatidylcholine, PE, phosphatidylethanolamine; PG, phosphatidylglycerol; PGE-M, Prostaglandin E2 metabolite; Phe, phenylalanine; Pro, proline; sat, saturated; Ser, serine; SM, sphingomyelin; SPC, sphingosylphosphorylcholine; Thr, threonine; Trp, tryptophan; Tyr, tyrosine; unsat, unsaturated; Val, valine.

Table S4. QUADAS tool.

| First author, Year     | Risk of bias      |            |                    |                 | Concerns regarding applicability |            |                    |
|------------------------|-------------------|------------|--------------------|-----------------|----------------------------------|------------|--------------------|
|                        | Patient selection | Index test | Reference standard | Flow and timing | Patient selection                | Index test | Reference standard |
| Dried blood spot       |                   |            |                    |                 |                                  |            |                    |
| Jing, 2017 [18]        | ⊗                 | ⊗          | ⊗                  | ⊗               | ⊗                                | ⊗          | ⊗                  |
| Serum                  |                   |            |                    |                 |                                  |            |                    |
| Zhang, 2018 [22]       | ⊗                 | ⊗          | ⊗                  | ? ⊗             | ⊗                                | ⊗          | ? ⊗                |
| Guo, 2017 [24]         | ⊗                 | ⊗          | ? ⊗                | ? ⊗             | ⊗                                | ⊗          | ? ⊗                |
| Hata, 2017 [25]        | ⊗                 | ⊗          | ? ⊗                | ? ⊗             | ⊗                                | ⊗          | ⊗                  |
| Uchiyama, 2017 [23]    | ⊗                 | ⊗          | ? ⊗                | ? ⊗             | ⊗                                | ⊗          | ? ⊗                |
| Farshidfar, 2016 [14]  | ⊗                 | ⊗          | ⊗                  | ⊗               | ⊗                                | ⊗          | ⊗                  |
| Y. Zhang, 2016 [26]    | ⊗                 | ⊗          | ? ⊗                | ? ⊗             | ⊗                                | ⊗          | ? ⊗                |
| H. Gu, 2015 [27]       | ⊗                 | ⊗          | ⊗                  | ⊗               | ⊗                                | ⊗          | ⊗                  |
| Zhu, 2014 [28]         | ? ⊗               | ⊗          | ⊗                  | ⊗               | ? ⊗                              | ⊗          | ⊗                  |
| F. Li, 2013 [29]       | ⊗                 | ⊗          | ? ⊗                | ? ⊗             | ⊗                                | ⊗          | ? ⊗                |
| Ritchie, 2013 [30]     | ? ⊗               | ? ⊗        | ⊗                  | ? ⊗             | ⊗                                | ⊗          | ⊗                  |
| Tan, 2013 [31]         | ⊗                 | ⊗          | ? ⊗                | ? ⊗             | ⊗                                | ⊗          | ? ⊗                |
| Ikeda, 2012 [32]       | ⊗                 | ⊗          | ⊗                  | ⊗               | ⊗                                | ⊗          | ⊗                  |
| Leichtle, 2012 [33]    | ⊗                 | ⊗          | ? ⊗                | ? ⊗             | ⊗                                | ⊗          | ? ⊗                |
| Ma, 2012 [34]          | ⊗                 | ⊗          | ? ⊗                | ? ⊗             | ⊗                                | ⊗          | ? ⊗                |
| Nishiumi, 2012 [35]    | ⊗                 | ⊗          | ? ⊗                | ⊗               | ⊗                                | ⊗          | ⊗                  |
| Ritchie, 2010 [36]     | ⊗                 | ⊗          | ⊗                  | ? ⊗             | ⊗                                | ⊗          | ⊗                  |
| Ludwig, 2009 [37]      | ⊗                 | ⊗          | ? ⊗                | ? ⊗             | ⊗                                | ⊗          | ? ⊗                |
| Plasma                 |                   |            |                    |                 |                                  |            |                    |
| Liu, 2018 [38]         | ⊗                 | ⊗          | ? ⊗                | ? ⊗             | ⊗                                | ⊗          | ? ⊗                |
| Nishiumi, 2017 [39]    | ⊗                 | ⊗          | ⊗                  | ? ⊗             | ⊗                                | ⊗          | ⊗                  |
| Shen, 2017 [40]        | ⊗                 | ⊗          | ? ⊗                | ? ⊗             | ⊗                                | ⊗          | ? ⊗                |
| Crotti, 2016 [41]      | ⊗                 | ⊗          | ⊗                  | ⊗               | ⊗                                | ⊗          | ⊗                  |
| Cavia-Saiz, 2014 [42]  | ⊗                 | ⊗          | ⊗                  | ⊗               | ⊗                                | ⊗          | ⊗                  |
| S. Li, 2013 [43]       | ⊗                 | ⊗          | ⊗                  | ⊗               | ⊗                                | ⊗          | ⊗                  |
| Miyagi, 2011 [44]      | ⊗                 | ⊗          | ? ⊗                | ? ⊗             | ⊗                                | ⊗          | ? ⊗                |
| Okamoto, 2009 [45]     | ⊗                 | ⊗          | ? ⊗                | ⊗               | ⊗                                | ⊗          | ? ⊗                |
| Zhao, 2007 [46]        | ⊗                 | ⊗          | ? ⊗                | ? ⊗             | ⊗                                | ⊗          | ? ⊗                |
| Urine                  |                   |            |                    |                 |                                  |            |                    |
| Nakajima, 2018 [47]    | ⊗                 | ⊗          | ? ⊗                | ? ⊗             | ⊗                                | ⊗          | ? ⊗                |
| Deng, Chang, 2017 [48] | ⊗                 | ⊗          | ⊗                  | ⊗               | ⊗                                | ⊗          | ⊗                  |
| Deng, Fang, 2017 [19]  | ⊗                 | ⊗          | ⊗                  | ⊗               | ⊗                                | ⊗          | ⊗                  |
| Wang, 2017 [49]        | ⊗                 | ⊗          | ? ⊗                | ? ⊗             | ⊗                                | ⊗          | ? ⊗                |
| Rozalski, 2015 [50]    | ⊗                 | ⊗          | ⊗                  | ⊗               | ⊗                                | ⊗          | ⊗                  |
| Wang, 2014 [51]        | ⊗                 | ⊗          | ⊗                  | ⊗               | ⊗                                | ⊗          | ⊗                  |
| Eisner, 2013 [16]      | ⊗                 | ⊗          | ⊗                  | ⊗               | ⊗                                | ⊗          | ⊗                  |
| Hsu, 2013 [52]         | ⊗                 | ⊗          | ? ⊗                | ? ⊗             | ⊗                                | ⊗          | ? ⊗                |
| Yue, 2013 [17]         | ⊗                 | ⊗          | ? ⊗                | ? ⊗             | ⊗                                | ⊗          | ? ⊗                |
| Chen, 2012 [53]        | ⊗                 | ⊗          | ? ⊗                | ⊗               | ⊗                                | ⊗          | ⊗                  |
| Cheng, 2012 [54]       | ⊗                 | ⊗          | ? ⊗                | ? ⊗             | ⊗                                | ⊗          | ? ⊗                |
| Wang, 2010 [21]        | ⊗                 | ⊗          | ? ⊗                | ? ⊗             | ⊗                                | ⊗          | ? ⊗                |
| Johnson, 2006 [20]     | ⊗                 | ⊗          | ⊗                  | ⊗               | ⊗                                | ⊗          | ⊗                  |
| Feng, 2005 [55]        | ⊗                 | ⊗          | ? ⊗                | ? ⊗             | ⊗                                | ⊗          | ? ⊗                |
| Hiramatsu, 2005 [56]   | ⊗                 | ⊗          | ? ⊗                | ? ⊗             | ⊗                                | ⊗          | ? ⊗                |
| Zheng, 2005 [57]       | ⊗                 | ? ⊗        | ⊗                  | ⊗               | ⊗                                | ⊗          | ⊗                  |
| Feces                  |                   |            |                    |                 |                                  |            |                    |
| Lin, 2016 [58]         | ⊗                 | ⊗          | ⊗                  | ? ⊗             | ⊗                                | ⊗          | ⊗                  |
| Amiot, 2015 [59]       | ⊗                 | ⊗          | ⊗                  | ⊗               | ⊗                                | ⊗          | ⊗                  |
| Phua, 2014 [15]        | ⊗                 | ⊗          | ? ⊗                | ⊗               | ⊗                                | ⊗          | ⊗                  |
| Bezabeh, 2009 [60]     | ? ⊗               | ⊗          | ⊗                  | ⊗               | ? ⊗                              | ⊗          | ⊗                  |

Note: ⊗ high risk; ⊗ low risk; ? ⊗ unclear risk.

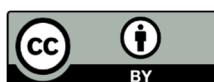

© 2018 by the authors. Licensee MDPI, Basel, Switzerland. This article is an open access article distributed under the terms and conditions of the Creative Commons Attribution (CC BY) license (<http://creativecommons.org/licenses/by/4.0/>).
